# Supplementary material
Source: publisher figshare collection journal article supplement (https://tandf.figshare.com/articles/dataset/_/8945123)
Supplement: Supplementary file 1 [file 1]

### Supplementary table3. Sensitivity analysis

The sensitivity analysis of the relationship between whole grain consumption and the risk of gastric cancer.

| Excluded studies    | No. of included studies | I <sup>2</sup> | OR   | 95%CI       | P     |
|---------------------|-------------------------|----------------|------|-------------|-------|
| no                  | 5                       | 6.6%           | 0.87 | (0.79,0.95) | 0.003 |
| Marjorie et al,2001 | 4                       | 0%             | 0.74 | (0.62,0.89) | 0.001 |
| Vecchia et al,1988  | 4                       | 1.4%           | 0.88 | (0.79,0.97) | 0.009 |
| Boeing et al,1991   | 4                       | 24.1%          | 0.87 | (0.79,0.96) | 0.004 |
| Boeing et al,1991   | 4                       | 28.1%          | 0.87 | (0.79,0.96) | 0.005 |
| Mathew et al,2000   | 4                       | 0%             | 0.89 | (0.80,0.99) | 0.039 |

The sensitivity analysis of the relationship between a large amount of whole grain consumption and the risk of gastric cancer.

| Excluded studies    | No. of included studies | I <sup>2</sup> | OR   | 95%CI       | P      |
|---------------------|-------------------------|----------------|------|-------------|--------|
| no                  | 5                       | 74.7%          | 0.61 | (0.43,0.85) | 0.004  |
| Marjorie et al,2001 | 4                       | 12.6%          | 0.56 | (0.45,0.69) | <0.001 |
| Vecchia et al,1988  | 4                       | 79.5%          | 0.63 | (0.44,0.89) | 0.01   |
| Boeing et al,1991   | 4                       | 62.5%          | 0.70 | (0.52,0.94) | 0.017  |
| Boeing et al,1991   | 4                       | 77.4%          | 0.58 | (0.36,0.95) | 0.031  |
| Hansson et al,1993  | 4                       | 79.9%          | 0.60 | (0.40,0.91) | 0.015  |

The sensitivity analysis of the relationship between a moderate amount of whole grain consumption and the risk of gastric cancer.

| Excluded studies    | No. of included studies | I <sup>2</sup> | OR   | 95%CI       | P     |
|---------------------|-------------------------|----------------|------|-------------|-------|
| no                  | 5                       | 0.0%           | 0.93 | (0.83,1.05) | 0.273 |
| Marjorie et al,2001 | 4                       | 0.0%           | 0.93 | (0.78,1.00) | 0.037 |
| Vecchia et al,1988  | 4                       | 0.0%           | 0.95 | (0.84,1.08) | 0.420 |
| Boeing et al,1991   | 4                       | 0.0%           | 0.92 | (0.81,1.04) | 0.202 |
| Boeing et al,1991   | 4                       | 0.0%           | 0.91 | (0.79,1.04) | 0.180 |
| Hansson et al,1993  | 4                       | 0.0%           | 0.95 | (0.84,1.08) | 0.436 |

The sensitivity analysis of the relationship between refined grain consumption and the risk of gastric cancer.

| Excluded studies     | No. of included studies | I <sup>2</sup> | OR   | 95%CI       | P      |
|----------------------|-------------------------|----------------|------|-------------|--------|
| no                   | 18                      | 56.5%          | 1.36 | (1.21,1.54) | <0.001 |
| Stephanieet al,2008  | 17                      | 54.8%          | 1.34 | (1.18,1.53) | <0.001 |
| Chatenoud et al,1999 | 17                      | 59.0%          | 1.37 | (1.19,1.57) | <0.001 |
| Lissowska et al,2009 | 17                      | 56.7%          | 1.34 | (1.18,1.52) | <0.001 |
| Mathew et al,2000    | 17                      | 49.2%          | 1.32 | (1.23,1.42) | <0.001 |
| Mathew et al,2000    | 17                      | 58.9%          | 1.37 | (1.21,1.56) | <0.001 |
| Vecchia et al,1987   | 17                      | 57.4%          | 1.38 | (1.22,1.56) | <0.001 |
| Stefani et al,2004   | 17                      | 59.0%          | 1.36 | (1.20,1.54) | <0.001 |
| Stefani et al,2004   | 17                      | 59.0%          | 1.37 | (1.20,1.56) | <0.001 |
| You et al,1988       | 17                      | 42.8%          | 1.40 | (1.30,1.51) | <0.001 |
| Sumathi et al,2009   | 17                      | 58.1%          | 1.38 | (1.22,1.56) | <0.001 |
| Gao et al,1999       | 17                      | 59.0%          | 1.36 | (1.20,1.54) | <0.001 |
| Hansson et al,1993   | 17                      | 47.3%          | 1.38 | (1.28,1.48) | <0.001 |
| Inoue et al,1996     | 17                      | 58.3%          | 1.35 | (1.19,1.53) | <0.001 |
| Li et al,1989        | 17                      | 57.6%          | 1.35 | (1.19,1.53) | <0.001 |
| Ai et al,2009        | 17                      | 58.7%          | 1.36 | (1.20,1.54) | <0.001 |
| Ramón et al,1992     | 17                      | 58.3%          | 1.37 | (1.21,1.55) | <0.001 |
| Vecchia et al,1988   | 17                      | 58.8%          | 1.36 | (1.19,1.55) | <0.001 |
| Hoshiyama et al,1992 | 17                      | 55.3%          | 1.34 | (1.18,1.51) | <0.001 |

The sensitivity analysis of the relationship between a large amount of refined grain consumption and the risk of gastric cancer.

| Excluded studies     | No. of included studies | I <sup>2</sup> | OR   | 95%CI       | P      |
|----------------------|-------------------------|----------------|------|-------------|--------|
| no                   | 18                      | 27.4%          | 1.63 | (1.49,1.79) | <0.001 |
| Stephanieet al,2008  | 17                      | 36.5%          | 1.23 | (1.12,1.35) | <0.001 |
| Chatenoud et al,1999 | 17                      | 44.1%          | 1.29 | (1.18,1.42) | <0.001 |
| Lissowska et al,2009 | 17                      | 41.8%          | 1.27 | (1.17,1.38) | <0.001 |
| Mathew et al,2000    | 17                      | 38.6%          | 1.27 | (1.17,1.39) | <0.001 |
| Mathew et al,2000    | 17                      | 40.1%          | 1.29 | (1.18,1.40) | <0.001 |
| Vecchia et al,1987   | 17                      | 38.9%          | 1.31 | (1.20,1.42) | <0.001 |
| Stefani et al,2004   | 17                      | 41.6%          | 1.29 | (1.19,1.41) | <0.001 |

|                      |    |       |      |             |        |
|----------------------|----|-------|------|-------------|--------|
| Stefani et al,2004   | 17 | 43.7% | 1.29 | (1.18,1.40) | <0.001 |
| You et al,1988       | 17 | 39.9% | 1.30 | (1.19,1.42) | <0.001 |
| Sumathi et al,2009   | 17 | 36.6% | 1.30 | (1.19,1.41) | <0.001 |
| Gao et al,1999       | 17 | 40.9% | 1.29 | (1.19,1.41) | <0.001 |
| Hansson et al,1993   | 17 | 39.8% | 1.30 | (1.19,1.41) | <0.001 |
| Inoue et al,1996     | 17 | 40.2% | 1.27 | (1.17,1.38) | <0.001 |
| Li et al,1989        | 17 | 35.9% | 1.24 | (1.13,1.36) | <0.001 |
| Ai et al,2009        | 17 | 44.2% | 1.28 | (1.18,1.40) | <0.001 |
| Ramón et al,1992     | 17 | 43.8% | 1.29 | (1.18,1.40) | <0.001 |
| Vecchia et al,1988   | 17 | 44.3% | 1.28 | (1.17,1.40) | <0.001 |
| Hoshiyama et al,1992 | 17 | 41.3% | 1.27 | (1.16,1.38) | <0.001 |

**The sensitivity analysis of the relationship between a moderate amount of refined grain consumption and the risk of gastric cancer.**

| Excluded studies     | No. of included studies | I <sup>2</sup> | OR   | 95%CI       | P      |
|----------------------|-------------------------|----------------|------|-------------|--------|
| no                   | 18                      | 40.8%          | 1.28 | (1.18,1.39) | <0.001 |
| Stephanieet al,2008  | 17                      | 31.2%          | 1.65 | (1.48,1.84) | <0.001 |
| Chatenoud et al,1999 | 17                      | 31.0%          | 1.65 | (1.49,1.82) | <0.001 |
| Lissowska et al,2009 | 17                      | 31.3%          | 1.63 | (1.48,1.79) | <0.001 |
| Mathew et al,2000    | 17                      | 19.7%          | 1.62 | (1.47,1.78) | <0.001 |
| Mathew et al,2000    | 17                      | 29.8%          | 1.63 | (1.48,1.79) | <0.001 |
| Vecchia et al,1987   | 17                      | 31.5%          | 1.64 | (1.49,1.81) | <0.001 |
| Stefani et al,2004   | 17                      | 28.4%          | 1.61 | (1.47,1.78) | <0.001 |
| Stefani et al,2004   | 17                      | 31.4%          | 1.64 | (1.49,1.81) | <0.001 |
| You et al,1988       | 17                      | 11.2%          | 1.69 | (1.53,1.86) | <0.001 |
| Sumathi et al,2009   | 17                      | 30.6%          | 1.64 | (1.49,1.80) | <0.001 |
| Gao et al,1999       | 17                      | 26.2%          | 1.62 | (1.48,1.78) | <0.001 |
| Hansson et al,1993   | 17                      | 11.9%          | 1.67 | (1.52,1.84) | <0.001 |
| Inoue et al,1996     | 17                      | 30.2%          | 1.64 | (1.49,1.80) | <0.001 |
| Li et al,1989        | 17                      | 22.5%          | 1.58 | (1.43,1.75) | <0.001 |
| Ai et al,2009        | 17                      | 29.1%          | 1.63 | (1.48,1.79) | <0.001 |
| Ramón et al,1992     | 17                      | 30.8%          | 1.63 | (1.48,1.79) | <0.001 |
| Vecchia et al,1988   | 17                      | 31.7%          | 1.63 | (1.49,1.80) | <0.001 |
| Hoshiyama et al,1992 | 17                      | 26.8%          | 1.62 | (1.47,1.78) | <0.001 |

The sensitivity analysis of the relationship between a small amount of refined grain consumption and the risk of gastric cancer.

| Excluded studies     | No. of included studies | I <sup>2</sup> | OR   | 95%CI       | P     |
|----------------------|-------------------------|----------------|------|-------------|-------|
| no                   | 7                       | 74.7%          | 0.91 | (0.68,1.21) | 0.509 |
| Lissowska et al,2009 | 6                       | 74.7%          | 0.84 | (0.62,1.14) | 0.267 |
| Mathew et al,2000    | 6                       | 78.2%          | 0.87 | (0.63,1.20) | 0.400 |
| Vecchia et al,1987   | 6                       | 75.1%          | 0.95 | (0.69,1.31) | 0.758 |
| You et al,1988       | 6                       | 78.8%          | 0.90 | (0.64,1.29) | 0.577 |
| Hansson et al,1993   | 6                       | 78.9%          | 0.90 | (0.64,1.26) | 0.533 |
| Li et al,1989        | 6                       | 74.2%          | 0.86 | (0.61,1.19) | 0.358 |
| Ramón et al,1992     | 6                       | 49.3%          | 1.02 | (0.88,1.17) | 0.811 |

The sensitivity analysis of the relationship between rice consumption and the risk of gastric cancer.

| Excluded studies     | No. of included studies | I <sup>2</sup> | OR   | 95%CI       | P      |
|----------------------|-------------------------|----------------|------|-------------|--------|
| no                   | 9                       | 28.8%          | 1.53 | (1.31,1.79) | <0.001 |
| Mathew et al,2000    | 8                       | 0%             | 1.46 | (1.24,1.72) | <0.001 |
| Vecchia et al,1988   | 8                       | 4.6%           | 1.63 | (1.38,1.93) | <0.001 |
| Stefani et al,2004   | 8                       | 37.5%          | 1.54 | (1.31,1.81) | <0.001 |
| Gao et al,1999       | 8                       | 37.7%          | 1.53 | (1.31,1.80) | <0.001 |
| Inoue et al,1996     | 8                       | 37.3%          | 1.52 | (1.29,1.80) | <0.001 |
| Ai et al,2009        | 8                       | 37.7%          | 1.53 | (1.30,1.80) | <0.001 |
| Ramón et al,1992     | 8                       | 29.8%          | 1.56 | (1.33,1.82) | <0.001 |
| Vecchia et al,1988   | 8                       | 36.2%          | 1.57 | (1.31,1.88) | <0.001 |
| Hoshiyama et al,1992 | 8                       | 30.7%          | 1.46 | (1.22,1.75) | <0.001 |

The sensitivity analysis of the relationship between non-rice consumption and the risk of gastric cancer.

| Excluded studies     | No. of included studies | I <sup>2</sup> | OR   | 95%CI       | P      |
|----------------------|-------------------------|----------------|------|-------------|--------|
| no                   | 9                       | 67.0%          | 1.28 | (1.11,1.49) | 0.001  |
| Stephanie et al,2008 | 8                       | 62.2%          | 1.24 | (1.06,1.45) | 0.007  |
| Chatenoud et al,1999 | 8                       | 70.7%          | 1.27 | (1.06,1.57) | 0.009  |
| Lissowska et al,2009 | 8                       | 67.2%          | 1.24 | (1.07,1.45) | 0.006  |
| Mathew et al,2000    | 8                       | 71.0%          | 1.29 | (1.10,1.51) | 0.002  |
| Stefani et al,2004   | 8                       | 71.1%          | 1.28 | (1.08,1.51) | 0.004  |
| You et al,1988       | 8                       | 53.8%          | 1.34 | (1.17,1.54) | <0.001 |

|                    |   |       |      |             |        |
|--------------------|---|-------|------|-------------|--------|
| Sumathi et al,2009 | 8 | 70.3% | 1.30 | (1.11,1.51) | 0.001  |
| Hansson et al,1993 | 8 | 58.6% | 1.34 | (1.16,1.54) | <0.001 |
| Li et al,1989      | 8 | 68.6% | 1.25 | (1.07,1.47) | 0.006  |
