# Supplementary material
Source: publisher figshare collection journal article supplement (https://tandf.figshare.com/articles/dataset/_/8945123)
Supplement: Supplementary file 2 [file 1]

Supplementary table 1. NOS scores for the included case-control studies

| Studies                | Sufficiency of case<br>definition | Representat-<br>iveness of<br>cases | Selection of<br>controls | Definition<br>of controls | Compar-<br>-ability | Exposure                |                                                                    |                       | Total<br>score |
|------------------------|-----------------------------------|-------------------------------------|--------------------------|---------------------------|---------------------|-------------------------|--------------------------------------------------------------------|-----------------------|----------------|
|                        |                                   |                                     |                          |                           |                     | Determining<br>exposure | whether the exposure methods of cases<br>and controls are the same | Non-respo<br>nse rate |                |
| Vecchia et al., 1988   | 1                                 | 1                                   | 1                        | 1                         | 2                   | 1                       | 1                                                                  | 1                     | 9              |
| Boeing et al., 1991    | 1                                 | 1                                   | 1                        | 1                         | 2                   | 1                       | 1                                                                  | 0                     | 8              |
| Boeing et al., 1991    | 1                                 | 1                                   | 0                        | 1                         | 2                   | 1                       | 1                                                                  | 0                     | 7              |
| Hansson et al., 1993   | 1                                 | 1                                   | 0                        | 1                         | 2                   | 1                       | 1                                                                  | 1                     | 8              |
| Stephanie et al., 2008 | 1                                 | 1                                   | 0                        | 1                         | 2                   | 1                       | 1                                                                  | 0                     | 7              |
| Chatenoud et al.,1999  | 1                                 | 1                                   | 1                        | 1                         | 2                   | 1                       | 1                                                                  | 1                     | 9              |
| Lissowska et al.,2009  | 1                                 | 1                                   | 1                        | 1                         | 2                   | 1                       | 1                                                                  | 0                     | 8              |
| Mathew et al., 2000    | 1                                 | 1                                   | 0                        | 1                         | 2                   | 1                       | 1                                                                  | 1                     | 8              |
| Vecchia et al.,1987    | 1                                 | 1                                   | 1                        | 1                         | 2                   | 1                       | 1                                                                  | 1                     | 9              |
| Stefani et al., 2004   | 1                                 | 1                                   | 1                        | 1                         | 2                   | 1                       | 1                                                                  | 1                     | 9              |
| You et al., 1988       | 1                                 | 1                                   | 1                        | 1                         | 2                   | 1                       | 0                                                                  | 0                     | 7              |
| Sumathi et al., 2009   | 1                                 | 1                                   | 0                        | 1                         | 2                   | 1                       | 1                                                                  | 0                     | 7              |
| Gao et al.,1999        | 1                                 | 1                                   | 1                        | 1                         | 2                   | 1                       | 1                                                                  | 0                     | 8              |
| Li et al.,1989         | 1                                 | 1                                   | 0                        | 1                         | 2                   | 1                       | 1                                                                  | 1                     | 8              |
| Ai et al.,2004         | 1                                 | 1                                   | 0                        | 1                         | 2                   | 1                       | 1                                                                  | 0                     | 8              |
| Ramón et al.,1992      | 1                                 | 1                                   | 0                        | 1                         | 2                   | 1                       | 1                                                                  | 1                     | 8              |
| Hoshiyama et al.,1992  | 1                                 | 1                                   | 0                        | 1                         | 2                   | 1                       | 1                                                                  | 0                     | 7              |

Supplementary table 2. NOS scores for the included cohort studies

| Studies              | Selection                                   |                          |                              |                                                          | Compar-<br>ability | Outcomes                           |                             |                        | total<br>score |
|----------------------|---------------------------------------------|--------------------------|------------------------------|----------------------------------------------------------|--------------------|------------------------------------|-----------------------------|------------------------|----------------|
|                      | Representative of<br>the exposure<br>cohort | Non-exposed<br>selection | Determination<br>of exposure | No outcome events<br>occur to subjects before<br>studies |                    | Evaluation<br>of outcome<br>events | Sufficiency<br>of follow-up | Follow-up<br>integrity |                |
| Marjorie et al.,2001 | 1                                           | 0                        | 1                            | 1                                                        | 2                  | 1                                  | 1                           | 1                      | 8              |
| Inoue et al.,1996    | 1                                           | 1                        | 1                            | 1                                                        | 2                  | 1                                  | 1                           | 1                      | 9              |
